# Supplementary material for: Interaction of TLR4 and TLR8 in the Innate Immune Response against Mycobacterium Tuberculosis
Source: MDPI journal article supplement (doi:10.3390/ijms22041560), 2021-02-04
Supplement: s1 [file s1]

## Supplementary Data

### Tables

**Table S1:** Epidemiological characteristics of the Indian cohort consisting of TB patients and controls

| Variables                 |              | Controls     | Primary TB cases |              |                 | Relapse cases |
|---------------------------|--------------|--------------|------------------|--------------|-----------------|---------------|
|                           |              |              | All patients     | PTB          | EPTB            |               |
|                           |              |              | 301 (100)        | 346 (100)    | 224 (100)       | 121 (100)     |
| gender (N=767)*           | female       | 143 (50.89)  | 204 (58.96)      | 124 (55.36)  | 80(66.12)       | 47 (49.47)    |
|                           | Male         | 138 (49.11)  | 142 (41.04)      | 100 (44.64)  | 41 (33.88)      | 48 (50.53)    |
| BCG (N=637)**             | Yes          | 223 (82.90)  | 148 (48.84)      | 96 (51.61)   | 52 (44.44)      | 24 (25.26)    |
| BMI (N=648)***            | mean[SD<br>] | 24.30 [0.30] | 17.87 [0.24]     | 16.56 [0.22] | 19.94<br>[0.43] | 16.49 [2.38]  |
| Age (N=668)****           | mean[SD<br>] | 32.90 [059]  | 25.51 [0.60]     | 25.96 [0.82] | 24.79<br>[0.86] | 30.63 [11.08] |
| TLR8-Met1Val              | A/AA/A<br>G  | 139 (47.60)  | 199 (58.70)      | 124 (56.62)  | 75 (63.03)      | 68 (72.34)    |
|                           | G/GG         | 153 (52.40)  | 140 (41.30)      | 95 (43.38)   | 44 (36.97)      | 26 (27.66)    |
| TLR4-Thr399Ile<br>(N=717) | CT/CC        | 223 (76.32)  | 229 (68.56)      | 146 (66.97)  | 82 (71.30)      | 52 (61.18)    |
|                           | TT           | 68 (23.37)   | 105 (31.44)      | 72 (33.03)   | 33 (28.70)      | 33 (38.82)    |
| TLR4-Asp299Gly<br>(N=654) | AA           | 190 (72.52)  | 201 (58.09)      | 122 (65.59)  | 79 (69.30)      | 56 (58.95)    |
|                           | AG/GG        | 72 (27.48)   | 100 (28.90)      | 64 (34.41)   | 35 (30.70)      | 36 (37.89)    |

\* gender differed significantly between controls and primary TB ( $\chi^2=4.08$ ,  $p=0.043$ ), but not between primary TB and relapse cases ( $\chi^2=2.73$ ,  $p=0.098$ ).

\*\*BCG vaccination status differed significantly between controls and primary TB ( $\chi^2=72.51$ ,  $p<0.001$ ), but not between primary TB and relapse cases ( $\chi^2=3.06$ ,  $p=0.080$ ).

\*\*\*mean BMI differed significantly between controls and primary TB ( $t(571)=17.08$ ,  $p<0.001$ ), as well as between primary TB and relapse cases ( $t(376)=9.93$ ,  $p<0.001$ )

\*\*\*\*mean age differed significantly between controls and primary TB ( $t(572)=8.72$ ,  $p<0.001$ ), as well as between primary TB and relapse cases ( $t(396)=4.07$ ,  $p<0.001$ )

|

**Table S2. Comparison of German and Indian Healthy individuals regarding TLR-4-Thr399Ile (C>T) and TLR-4-Asp299Gly (A>G) allele status.**

| TLR SNPs  |                   | TLR4-Asp299Gly_ TLR4-Thr399Ile*** |        |       |        |
|-----------|-------------------|-----------------------------------|--------|-------|--------|
| Haplotype |                   | A_C                               | G_T    | G_C   | A_T    |
| Indian*   | Frequency         | 0.813                             | 0.095  | 0.058 | 0.034  |
|           | D                 | 0.0748                            |        |       |        |
|           | D'                | 0.687                             |        |       |        |
|           | r                 | 0.622                             |        |       |        |
|           | Cosegregation [%] | 73                                |        |       |        |
| German**  | Frequency         | 0.9404                            | 0.0518 | -     | 0.0078 |
|           | D                 | 0.049                             |        |       |        |
|           | D'                | 0.999                             |        |       |        |
|           | r                 | 0.928                             |        |       |        |
|           | Cosegregation [%] | 98                                |        |       |        |

\* Indian healthy subjects consisted of individuals from the TB cohort control group recruited Hyderabad, Andra Pradesh

\*\* German healthy subjects consisted of an internal Institute's control cohort in Berlin

\*\*\* Hardy-Weinberg-Equilibrium for both TLR4-Asp299Gly (P=0.140) and TLR4-Thr399Ile (p=0.590) were not significant. Statistic were calculated using SNPStats (<https://www.snpstats.net/start.htm?>)

**Table S3. Model for the impact of TLR4-Thr399Ile on being a primary TB case, compared to healthy controls.**

| Variable   | OR [95%CI]**       | Std Err | z     | p      |
|------------|--------------------|---------|-------|--------|
| TLR4-399T* | 0.64 [0.42-0.95]   | 0.13    | -2.19 | 0.028  |
| gender     | 0.69 [0.48-0.99]   | 0.13    | -1.97 | 0.048  |
| age        | 0.93 [0.91-0.95]   | 0.01    | -7.64 | 0.947  |
| constant   | 15.56 [7.88-30.71] | 5.8     | 7.91  | <0.001 |

\* Likelihood Ratio comparing model with and without TLR4-399T:  $\chi^2(1)=4.88$ ,  $p=0.027$

\*\* ORs calculated with Wald's test.

**Table S4. Model for the impact of the interaction of TLR8-M1V and BCG-status on being a primary TB case, compared to healthy controls.**

| Variable       | OR [95%CI]**       | Std Err | z     | p      |
|----------------|--------------------|---------|-------|--------|
| TLR8-1G        | 1.16 [0.57-2.33]   | 0.41    | 0.4   | 0.687  |
| BCG            | 0.38 [0.22-0.65]   | 0.15    | -3.5  | <0.001 |
| TLR8-1G x BCG* | 0.47 [0.20-1.07]   | 0.2     | -1.79 | 0.073  |
| gender         | 0.88 [0.60-1.29]   | 0.17    | -0.66 | 0.507  |
| age            | 0.94 [0.92-0.96]   | 0.01    | -6.51 | <0.001 |
| constant       | 17.76 [8.79-35.89] | 6.38    | 8.01  | <0.001 |

\*Likelihood Ratio comparing model with and without interaction term:  $\chi^2(1)=3.26$ ,  $p=0.071$

\*\* ORs calculated with Wald's test.

**Table S5. Model for the impact of TLR8-M1V on being a relapse, compared to primary TB cases.**

| Variable | OR [95%CI]**     | Std Err | z     | p      |
|----------|------------------|---------|-------|--------|
| TLR8-1G* | 0.49 [0.26-0.90] | 0.15    | -2.29 | 0.022  |
| BCG      | 0.46 [0.25-0.83] | 0.14    | -2.56 | 0.011  |
| gender   | 2.19 [1.20-3.99] | 0.67    | 2.55  | 0.011  |
| age      | 1.04 [1.02-1.07] | 0.01    | 3.29  | 0.001  |
| constant | 0.08 [0.38-0.18] | 0.03    | -6.26 | <0.001 |

\* Likelihood Ratio comparing model with and without TLR8-1G :  $\chi^2(1)=5.53$ ,  $p=0.019$

\*\* ORs calculated with Wald's test.

**Table S6. Primers used for Light Cyclers Assays (Roche).**

| Gene                                          | Function | Primer                                  |
|-----------------------------------------------|----------|-----------------------------------------|
| <b>TLR8 M1V</b><br><b>(BioTez)</b>            | Forward  | TCAGGAAGTTAGCCAGTTTCTC                  |
|                                               | Backward | CCTGCATTTACAGTTGTTTCGAT                 |
|                                               | Sensor   | AAATAGAAGTGGCTTACCACGTTTCTGT-FITC       |
|                                               | Anchor   | Cy5-TTCTAATTTTTCATTCCGTAACCTGCAGCAGCGCA |
| <b>TLR4-Thr399Ile</b><br><b>(TIB Molbiol)</b> | Forward  | ATTTAAAGAAATTAGGCTTCATAAGCT             |
|                                               | Backward | CCAAGAAGTTTGAACTCATGGTAA                |
|                                               | Sensor   | LC640-ATTTTGGGACAACCAGCCTAAAGTAT        |
|                                               | Anchor   | CTTGAGTTTCAAAGGTTGCTGTTCTCAAAGT-FL      |
| <b>TLR4-Asp299Gly</b><br><b>(TIB Molbiol)</b> | Forward  | ATTTAAAGAAATTAGGCTTCATAAGCT             |
|                                               | Backward | CCAAGAAGTTTGAACTCATGGTAA                |
|                                               | Sensor   | CTACTACCTCGATGATATTATTGA-CTTATT-FL      |
|                                               | Anchor   | LC640-AATTGTTTGACAAATGTTTCTTCATTTTCC-PH |

**Table S7. Primers for Mutagenesis with QuikChange II XL Site-Directed Mutagenesis Kit (Agilent Genes).**

| Gene                                          | Function | Primer                                                                                   |
|-----------------------------------------------|----------|------------------------------------------------------------------------------------------|
| <b>TLR8 M1V</b><br><b>(BioTez)</b>            | Forward  | 5'GAGATCACCGGTCACCGTGGAACATGTTTC3'                                                       |
|                                               | Reverse  | 5'GGAACATGTTTTCCACGGTGACCGGTGATCTC3'                                                     |
| <b>TLR4-Thr399Ile</b><br><b>(TIB Molbiol)</b> | Forward  | 5'GCATACTTAGACTACTACCTCGATGG-                                                            |
|                                               | Reverse  | TATTATTGACTTATTTAATTGTTTGA3<br>5'TCAAACAATTAAATAAGTCAATAATACCATCGAGGTAGTAG-TCTAAGTATGC3' |
| <b>TLR4-Asp299Gly</b><br><b>(TIB Molbiol)</b> | Forward  | 5'AAATACTTTAGGCTGATTGTCCCAAATCACTTTGA-                                                   |
|                                               | Reverse  | GAACAGCA3<br>5'TGCTGTTCTCAAAGTGATTTTGG-GACAATCAGCCTAAAGTATTT3'                           |

**Figure S1. TLR4 peptide HCD Spectrum**

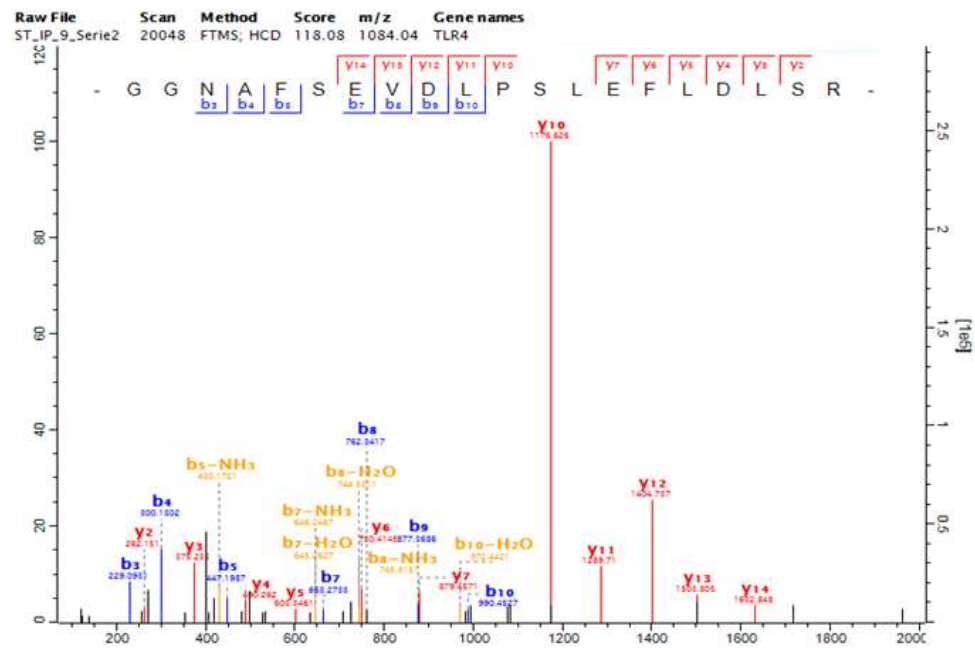

**Figure S1: TLR4 peptide HCD Spectrum.** TLR4 peptide HCD Spectrum. Successful identification of TLR4 peptide in a TL8/4 co-IP sample. Y and b are the ions generated after tryptic digestion (MS2 spectra). Y-axis: rel. intensity and x-axis: mass over charge ratio

**Figure S2: Co-immunoprecipitation of TLR4 and -8 with MD2 and CD14**

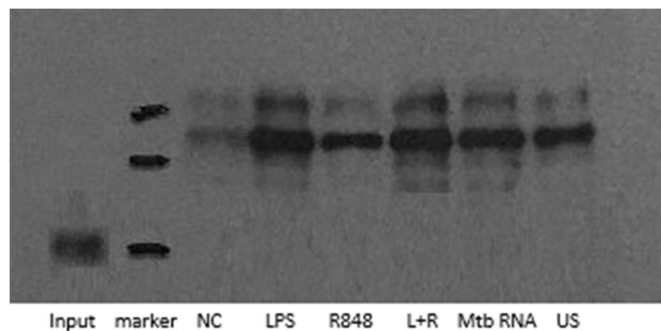

**Figure S2: Co-immunoprecipitation of TLR4 and -8 with MD2 and CD14.** HEK293 cells were transiently transfected with hTLR8HA and TLR4 399C-mCherry-myc 8 with MD2 and CD14 followed by LPS (10ng/ml), R848 (2 $\mu$ g/ml), LPS+R848 (L+R), Mtb RNA (1 $\mu$ g/ml) stimulation as shown above for 2 h. IP was performed with anti-HA-antibody and blot with anti-TLR4-antibody. Input: pre-IP sample, Nc: negative control. US: unstimulated.

**Figure S3: Co-immunoprecipitation of TLR7 and -4**

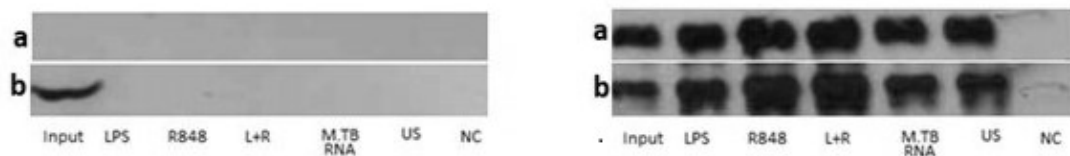

**Figure S3: Co-immunoprecipitation of TLR7 and -4.** HEK293 cells were transiently transfected with **a.** hTLR7FLAG, **b.** hTLR7FLAG + TLR4 399C-mCherry-myc followed by stimulation as shown above for 2 h. The left panel shows immunoprecipitation with anti-FLAG antibody and -blot with anti-TLR4 antibody, while the right panel shows immunoprecipitation and - blot with anti-FLAG antibody.

**Figure S4: Co-immunoprecipitation of TLR8 and Rhesus-TLR4 or C.atys-TLR4**

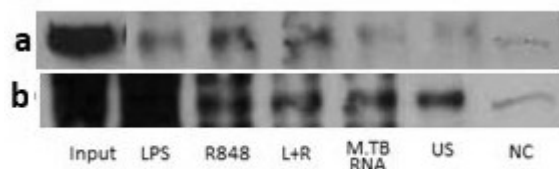

**Figure S4: Co-immunoprecipitation of TLR8 and Rhesus-TLR4 or C.atys-TLR4.** HEK293 cells are transiently transfected with **a.** RhesusTLR4-FLAG+hTLR8HA+UNC93B1, **b.** C.atysTLR4-FLAG+hTLR8HA+UNC93B1, followed by stimulation as shown above for 2 h.

The left panel shows immunoprecipitation with anti-HA antibody and –blot with anti-FLAG antibody

|



Figure S5. Co-transfection of TLR4, -8 and MD2 and CD14

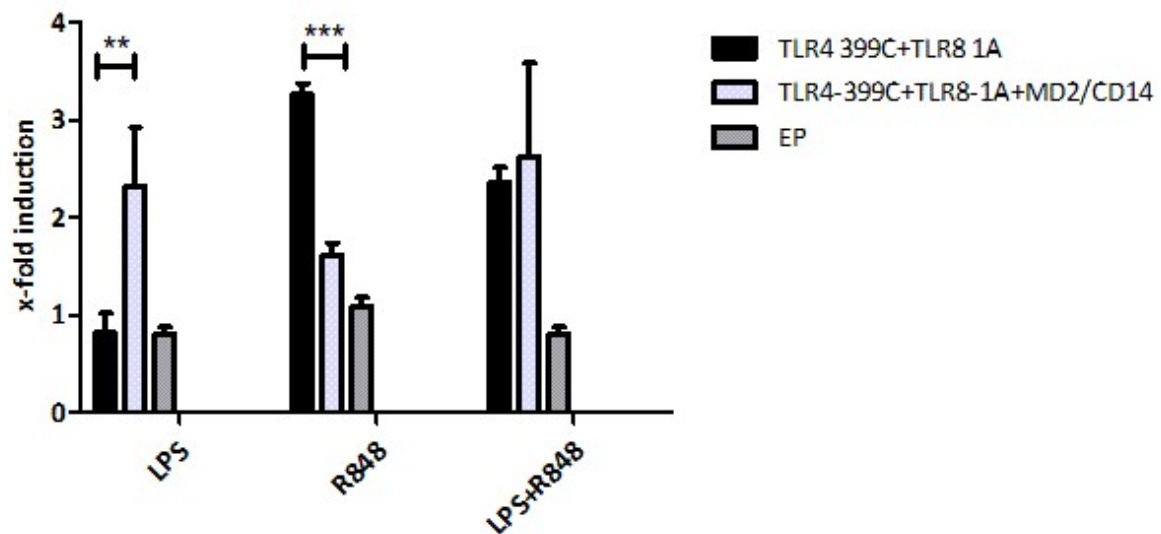

**Figure S5: Co-transfection of TLR4, -8 and MD2/CD14.** HEK293 blue null 1 cells were overexpressed with hTLR4 and -8 with or without addition of MD2 and CD14 as indicated or empty plasmid (EP), stimulated for 2h with LPS (10ng/ml), R848 (2μg/ml) or LPS+R848 and assessed for NF-κB via SEAP reporter gene assay. Adding MD2 and CD14 increased LPS responsiveness ( $t=4.29$ ,  $p=0.006$ ), but decreased R848 responsiveness ( $t=17.26$ ,  $p<0.001$ ).

Figure S6. Co-transfection of TLR4 and -8 and respective variant forms

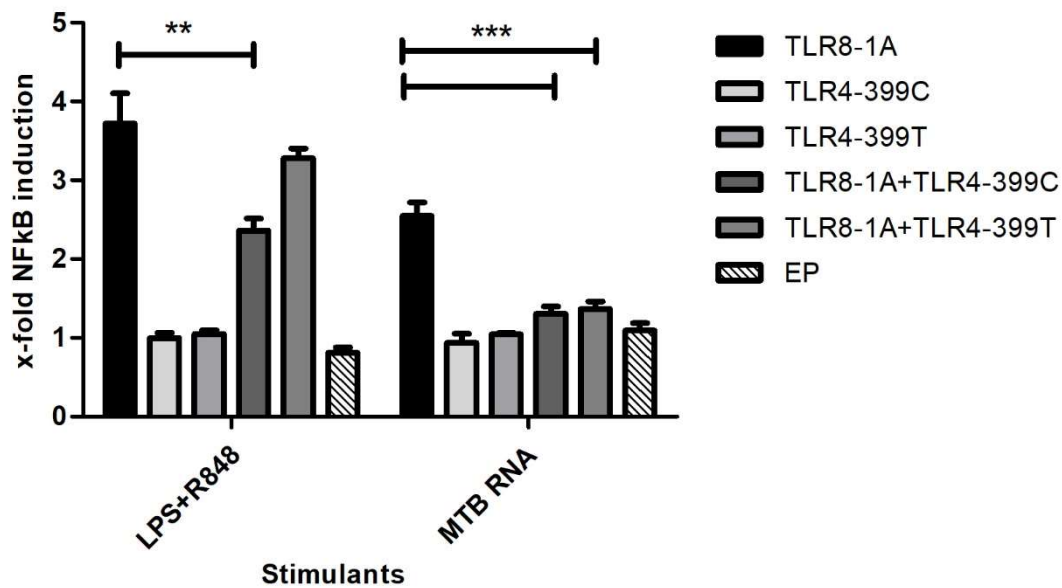

**Figure S6: Co-transfection of TLR8 with variants of TLR4.** HEK293 blue null 1 cells were overexpressed with hTLR8 and variant plasmids of hTLR4 or empty plasmid (EP), stimulated with LPS+R848 (10ng/ml+2μg/ml for 2h) and Mtb RNA (1μg/ml for 16h) and assessed for NF-κB via SEAP reporter gene assay. For LPS+R848, when adding to TLR8-1A TLR4-399C, NFκB-levels were significantly lower ( $p=0.05$ ) compared to only TLR8-1A. In combination with TLR4-399T, the difference upon stimulation with LPS+R848 was not significant ( $p=0.134$ ). For Mtb RNA, both adding TLR4-399C and TLR4-399T were significantly decreasing NFκB-induction ( $p<0.001$ ) compared to transfection with only TLR8-1A.

**Figure S7: TLR8 signalling inhibition with Bafilomycin or psiTLR8 in THP monocyte-derived macrophages cells**

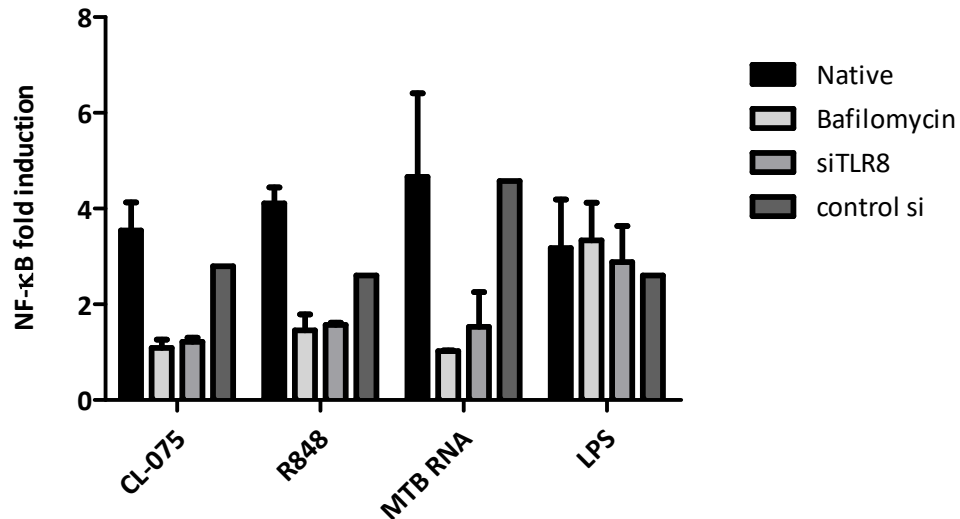

**Figure S7: Endosomal signalling adaptor protein inhibition with Bafilomycin or siTLR8 in THP monocyte-derived macrophages cells.** THP monocyte-derived macrophages were stimulated with CLO-075 (2  $\mu$ g/ml), R848 (5  $\mu$ g/ml), Mtb RNA (5 $\mu$ g/ml complexed with Lyovec) or LPS (10 ng/ml) with or without pre-treatment with bafilomycin or siTLR8. TLR8-ligand stimulation significantly decreased after bafilomycin treatment and siTLR8.

**Figure S8: LPS contamination check**

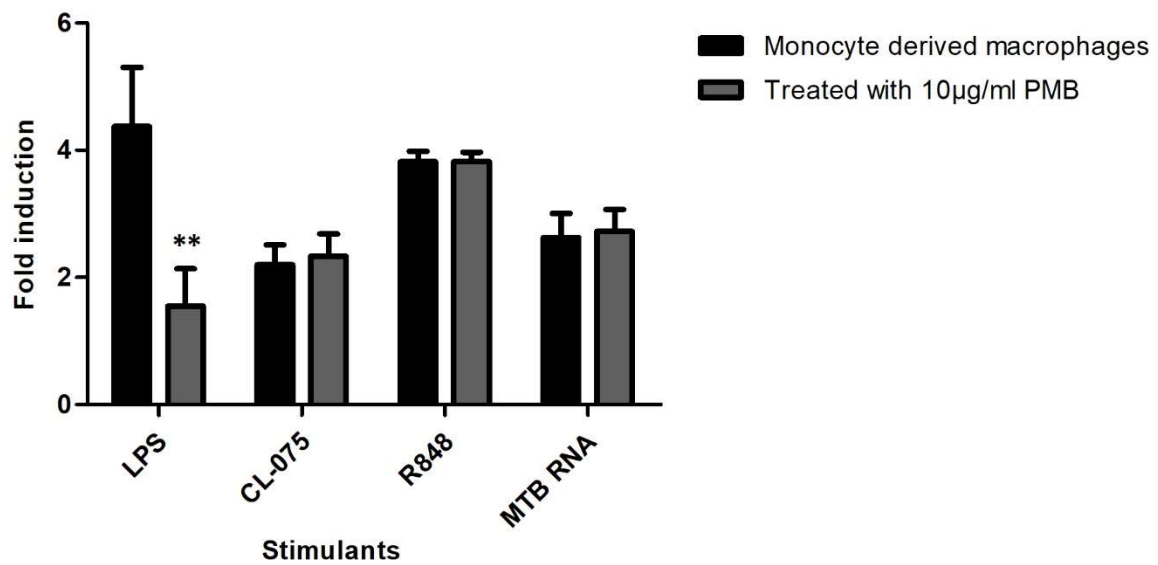

**Figure S8: LPS contamination check.** THP NFκB monocyte-derived macrophages were treated with PMB (10 µg/ml) and stimulated with CLO-075 (2 µg/ml), R848 (5 µg/ml), Mtb RNA (5µg/ml complexed with Lyovec) or LPS (10 ng/ml). LPS stimulation index significantly reduced in cells treated with PMB ( $p < 0.01$ ), all other stimulants did not show any reduction indicating there is no LPS contamination.
